# Supplementary material for: Engineering of nanoscale defect patterns in CeO2 nanorods via ex situ and in situ annealing
Source: Royal Society of Chemistry journal article supplement (doi:10.1039/c4nr07308h), 2015-01-01
Supplement: c4nr07308h1.pdf [file c4nr07308h1.pdf]

## Supporting information

# Engineering of nanoscale defect patterns in CeO<sub>2</sub> nanorods via ex-situ and in-situ annealing

*Tamil selvan Sakthivel,<sup>[a]</sup> David L. Reid,<sup>[a]</sup> Umananda M. Bhatta,<sup>[b]†</sup> Günter Möbus,<sup>[b]</sup> Dean C. Sayle,<sup>[c]</sup> and Sudipta Seal\*<sup>[a]</sup>*

<sup>[a]</sup>Advanced Materials Processing and Analysis Center (AMPAC), NanoScience Technology Center (NSTC), Materials Science Engineering (MSE), University of Central Florida  
4000, Central Florida Boulevard, Orlando, FL 32816, USA

<sup>[b]</sup>Department of Materials Science and Engineering, University of Sheffield, Mappin Street,  
Sheffield S1 3JD, UK.

<sup>[c]</sup>School of Physical Science, University of Kent, Canterbury, Kent, CT2 7NZ, UK

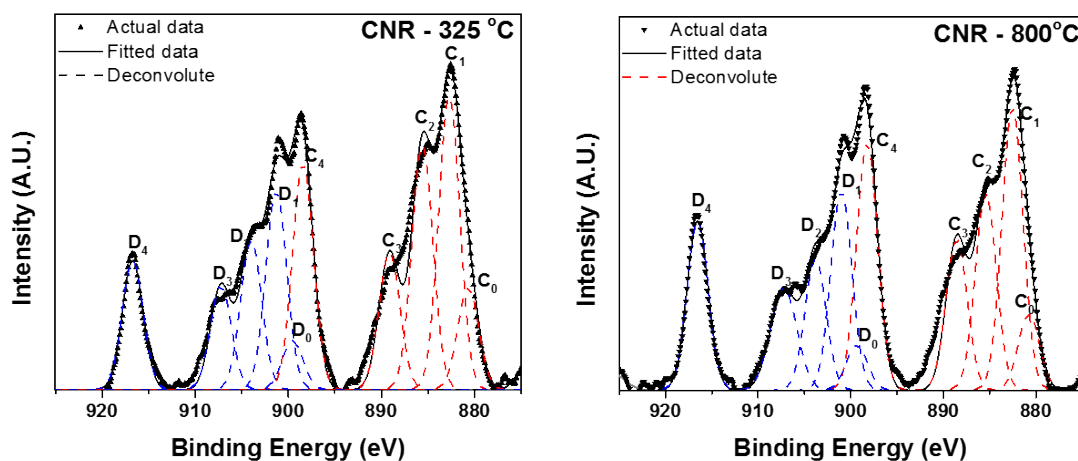

**Figure S1:** XPS Spectrum of Ce (3d) for CeO<sub>2</sub> nanorods annealed under oxidizing environment

**Table S1:** XPS binding energies of individual peak of the Ce (3d) spectrum for as-synthesized and post annealed CeO<sub>2</sub> nanorods

| Materials    | Ce (3d <sub>5/2</sub> ) |                |                |                |                | Ce (3d <sub>3/2</sub> ) |                |                |                |                |
|--------------|-------------------------|----------------|----------------|----------------|----------------|-------------------------|----------------|----------------|----------------|----------------|
|              | C <sub>0</sub>          | C <sub>1</sub> | C <sub>2</sub> | C <sub>3</sub> | C <sub>4</sub> | D <sub>0</sub>          | D <sub>1</sub> | D <sub>2</sub> | D <sub>3</sub> | D <sub>4</sub> |
| CNR – As     | 880.8                   | 882.8          | 885.4          | 888.8          | 897.8          | 899.7                   | 901.0          | 903.2          | 907.1          | 916.9          |
| CNR – 325 °C | 880.5                   | 882.6          | 885.5          | 888.9          | 897.9          | 899.5                   | 901.1          | 904.2          | 907.3          | 917.1          |
| CNR – 800 °C | 880.8                   | 882.4          | 885.9          | 888.6          | 898.2          | 899.4                   | 901.0          | 903.8          | 907.2          | 916.6          |

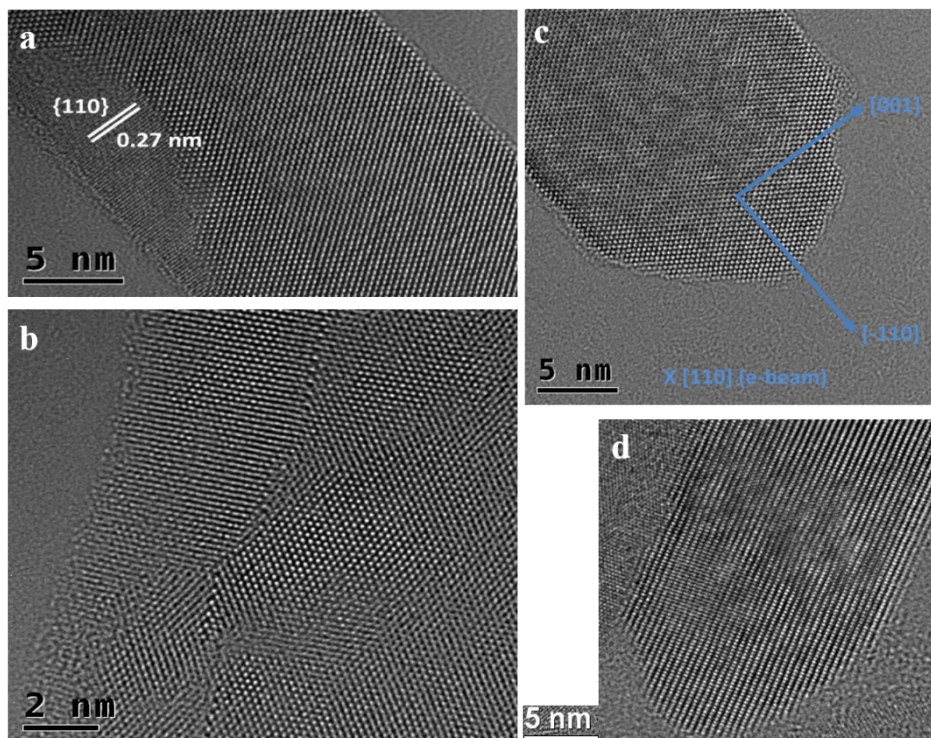

**Figure S2:** HRTEM images of as-synthesized CeO<sub>2</sub> nanorods from a minority of rods showing high crystallinity with occasional defects: (a) possible grain rotation, (b) some planar defect lines, (c) local {111} faceting leading to roundish tip avoiding flat {110} type face; (d) local lattice distortions / strain patches ( $\langle 211 \rangle$  viewing direction). All rods are {110} directed.

**At 600C after (80+180 min) annealing**

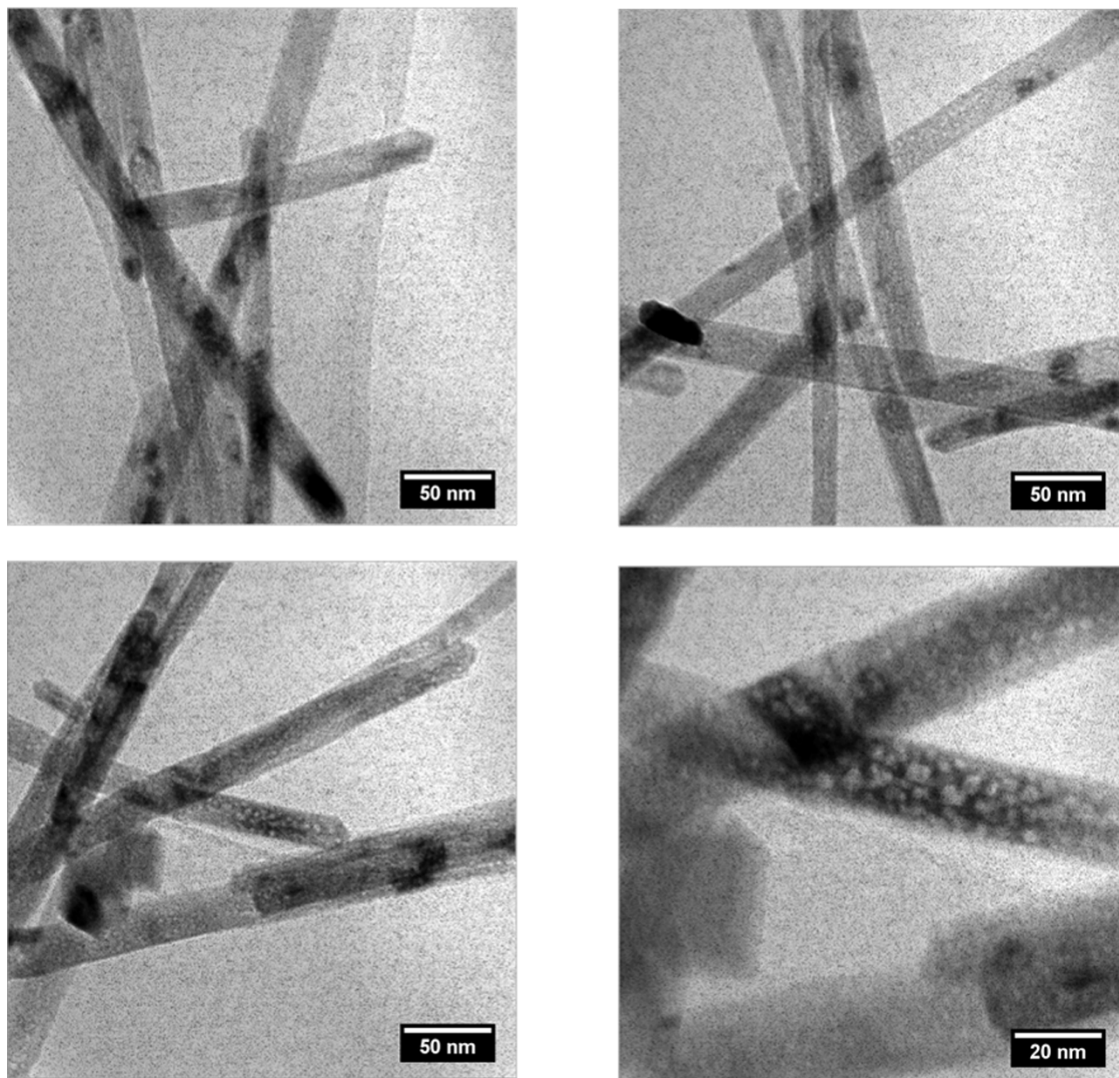

**Figure S3:** In situ TEM images in various places after heating at 600 °C.

## **AUTHOR INFORMATION**

### **Corresponding Author**

\*Sudipta Seal, [sudipta.seal@ucf.edu](mailto:sudipta.seal@ucf.edu)

University of Central Florida, Department of Materials Science and Engineering, Advanced  
Materials and Processing Center

Engineering Building 1 Room. 208

4000 Central Florida BLVD, 32816, Orlando, FL

### **Author present address**

†Umananda M. Bhatta

Jain University, Centre for Emerging Technologies\Jain Global Campus

Jakkasandra-562 112, Kanakapura Tq, Ramanagaram Dist, Karnataka, India
